# Supplementary material
Source: PubMed Central journal article supplement (PMC4498210)
Supplement: supp_tpc.15.00269_TPC2015-00269-RAR1_Supplemental_Data.pdf [file supp_tpc.15.00269_TPC2015-00269-RAR1_Supplemental_Data.pdf]

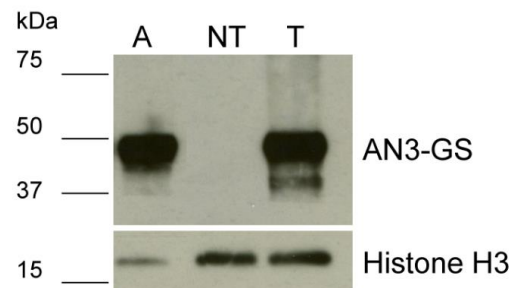

**Supplemental Figure 1.** Expression Analysis of the *AN3-GS1* maize line that was used for TAP. NT: protein extract from non-transgenic siblings from the segregating *AN-GS1* population; T: protein extract from transgenic siblings from the segregating *AN-GS1* population; A: protein extract from *Arabidopsis PSB-D* cell cultures transformed with the Ath\_AN3 bait fused to the GS TAP-tag; Histone H3 immunodetection was used as a protein loading control.

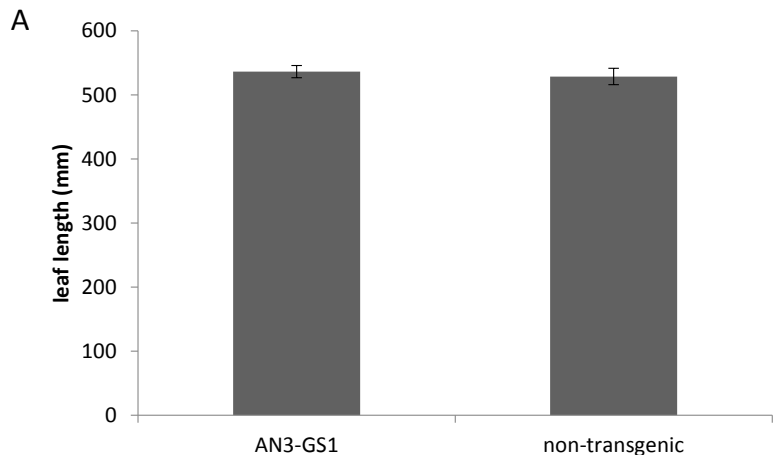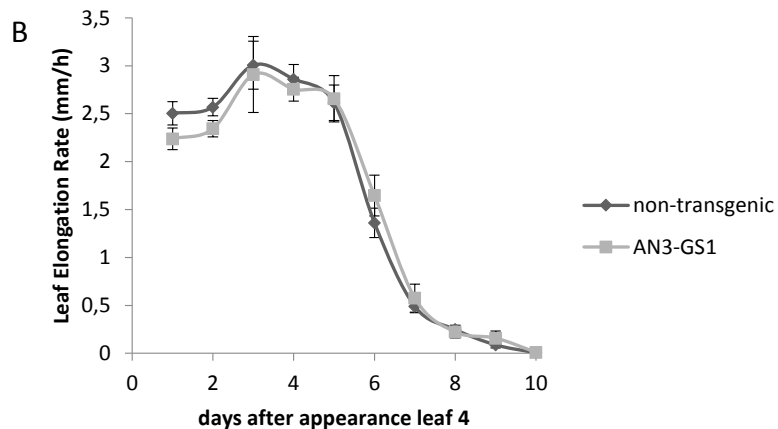

**Supplemental Figure 2.** Phenotype of the *AN3-GS1* Plants Compared to Their Non-Transgenic Siblings. Final length of leaf 4 (**A**), leaf elongation rate of leaf 4 (**B**) and plant development over time (**C**).  $\geq 10$  plants were used per analysis. DAS: days after sowing. Error bars represent standard error.

**C**

| days after sowing to reach developmental stage | germination | leaf2 | leaf4 | tassel |
|------------------------------------------------|-------------|-------|-------|--------|
| non-transgenics                                | 5,64        | 8,43  | 10,93 | 60,20  |
| AN3-GS1                                        | 5,60        | 8,40  | 10,40 | 67,60  |
| p-value                                        | 0,82        | 0,88  | 0,03  | 0,25   |

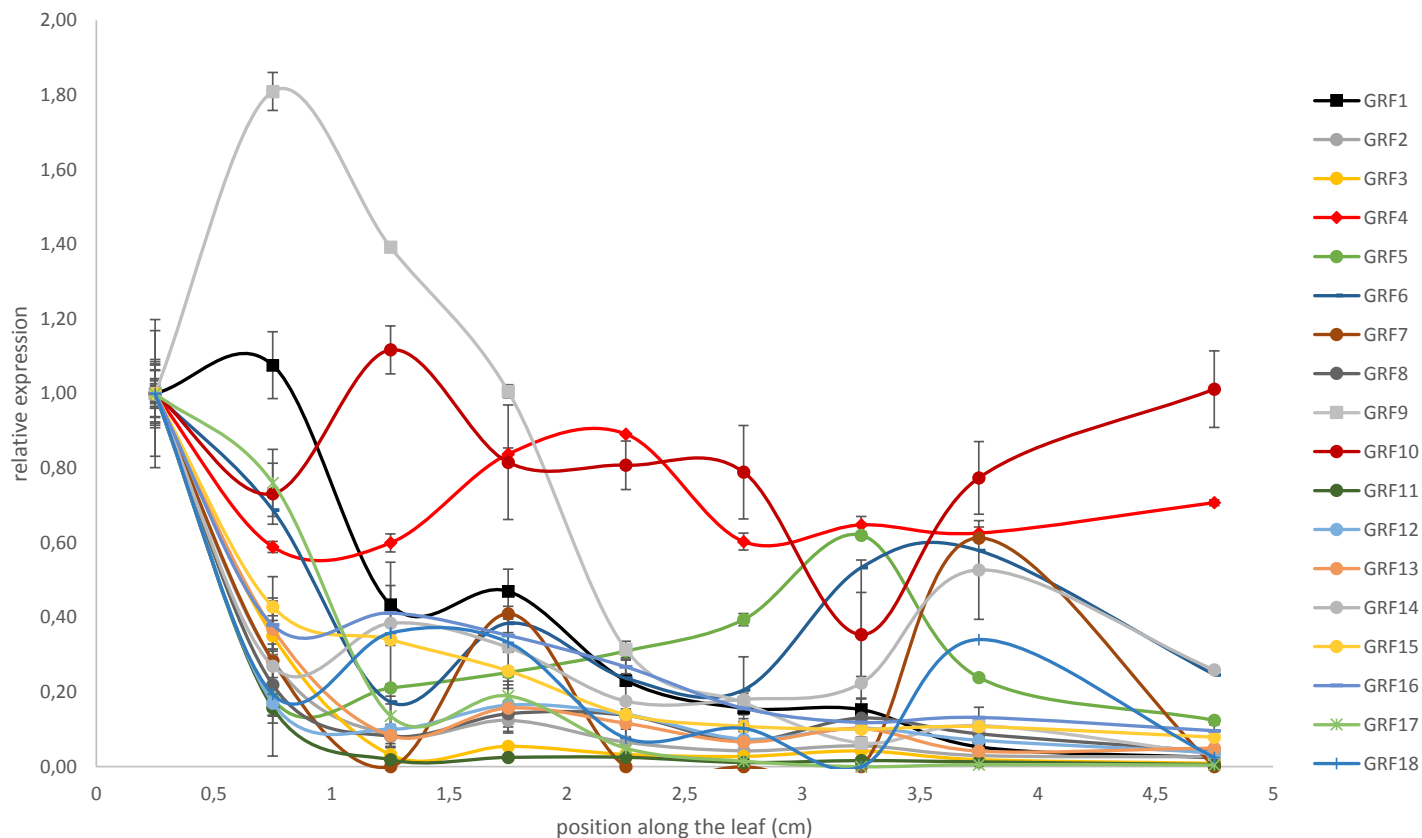

**Supplemental Figure 3.** Expression levels of the GRF genes over the maize leaf growth zone in B104 at steady state growth of leaf 4. Error bars represent standard error.

Supplemental Data. Nelissen et al. (2015). Plant Cell 10.1105/tpc.115.00269

Raw data for Supplemental Figure 3: Expression levels of the *GRF* genes over the maize leaf growth zone in B104 at steady state growth of leaf 4. Error bars represent standard error (SE).

| average | GRF1 | GRF2 | GRF3 | GRF4 | GRF5    | GRF6 | GRF7    | GRF8 | GRF9    | GRF10 | GRF11 | GRF12 | GRF13 | GRF14 |
|---------|------|------|------|------|---------|------|---------|------|---------|-------|-------|-------|-------|-------|
| 0,25    | 1,00 | 1,00 | 1,00 | 1,00 | 1,00    | 1,00 | 1,00    | 1,00 | 1,00    | 1,00  | 1,00  | 1,00  | 1,00  | 1,00  |
| 0,75    | 1,08 | 0,28 | 0,35 | 0,59 | 0,18    | 0,69 | 0,28    | 0,22 | 1,81    | 0,73  | 0,16  | 0,17  | 0,37  | 0,27  |
| 1,25    | 0,43 | 0,09 | 0,03 | 0,60 | 0,21    | 0,17 | #DIV/0! | 0,08 | 1,39    | 1,12  | 0,02  | 0,10  | 0,08  | 0,38  |
| 1,75    | 0,47 | 0,12 | 0,05 | 0,84 | 0,25    | 0,38 | 0,41    | 0,14 | 1,01    | 0,82  | 0,03  | 0,16  | 0,16  | 0,32  |
| 2,25    | 0,23 | 0,07 | 0,03 | 0,89 | 0,31    | 0,24 | #DIV/0! | 0,14 | 0,31    | 0,81  | 0,03  | 0,14  | 0,12  | 0,18  |
| 2,75    | 0,16 | 0,04 | 0,03 | 0,60 | 0,39    | 0,21 | #DIV/0! | 0,07 | 0,17    | 0,79  | 0,01  | 0,07  | 0,07  | 0,18  |
| 3,25    | 0,15 | 0,06 | 0,04 | 0,65 | 0,62    | 0,53 | #DIV/0! | 0,13 | 0,06    | 0,35  | 0,02  | 0,10  | 0,10  | 0,22  |
| 3,75    | 0,05 | 0,03 | 0,02 | 0,63 | 0,24    | 0,58 | 0,61    | 0,09 | 0,11    | 0,77  | 0,01  | 0,07  | 0,04  | 0,53  |
| 4,75    | 0,02 | 0,03 | 0,01 | 0,71 | 0,12    | 0,25 | #DIV/0! | 0,04 | 0,03    | 1,01  | 0,01  | 0,04  | 0,05  | 0,26  |
| SE      | GRF1 | GRF2 | GRF3 | GRF4 | GRF5    | GRF6 | GRF7    | GRF8 | GRF9    | GRF10 | GRF11 | GRF12 | GRF13 | GRF14 |
| 0,25    | 0,03 | 0,06 | 0,04 | 0,03 | 0,00    | 0,04 | 0,08    | 0,06 | 0,04    | 0,08  | 0,00  | 0,09  | 0,20  | 0,17  |
| 0,75    | 0,09 | 0,07 | 0,04 | 0,01 | #DIV/0! | 0,05 | 0,04    | 0,08 | 0,05    | 0,08  | 0,02  | 0,05  | 0,05  | 0,24  |
| 1,25    | 0,05 | 0,02 | 0,02 | 0,02 | 0,01    | 0,03 | #DIV/0! | 0,03 | 0,01    | 0,06  | 0,00  | 0,09  | 0,08  | 0,16  |
| 1,75    | 0,06 | 0,02 | 0,01 | 0,02 | 0,01    | 0,02 | #DIV/0! | 0,03 | 0,02    | 0,15  | 0,00  | 0,08  | 0,06  | 0,11  |
| 2,25    | 0,01 | 0,01 | 0,00 | 0,00 | 0,01    | 0,00 | #DIV/0! | 0,01 | 0,02    | 0,06  | 0,00  | 0,04  | 0,04  | 0,11  |
| 2,75    | 0,01 | 0,02 | 0,01 | 0,02 | 0,02    | 0,04 | #DIV/0! | 0,03 | 0,03    | 0,13  | 0,00  | 0,06  | 0,05  | 0,11  |
| 3,25    | 0,03 | 0,02 | 0,02 | 0,02 | 0,01    | 0,04 | #DIV/0! | 0,05 | 0,00    | 0,11  | 0,00  | 0,04  | 0,02  | 0,33  |
| 3,75    | 0,01 | 0,01 | 0,01 | 0,02 | 0,01    | 0,01 | #DIV/0! | 0,03 | 0,02    | 0,10  | 0,00  | 0,02  | 0,03  | 0,13  |
| 4,75    | 0,00 | 0,01 | 0,00 | 0,01 | 0,00    | 0,04 | #DIV/0! | 0,01 | #DIV/0! | 0,10  | 0,00  | 0,00  | 0,00  | 0,00  |

Supplemental Data. Nelissen et al. (2015). Plant Cell 10.1105/tpc.115.00269

Supplemental Table 1: Tandem Affinity Purification with ZmAN3 as bait. Additional proteins for which no orthologous interaction in *Arabidopsis* or human could be detected. cm1 corresponds to dividing cells, cm4 to expanding cells.

| Leading protein ID | Description                                     | LEAF entire growth zone        | LEAF division zone             | LEAF expansion zone            | EAR                        | At ortholog (BHF1) | <i>Arabidopsis</i> TAP |  |
|--------------------|-------------------------------------------------|--------------------------------|--------------------------------|--------------------------------|----------------------------|--------------------|------------------------|--|
|                    |                                                 | # 4cm Exps with id (in 2 Exps) | # cm1 Exps with id (in 4 Exps) | # cm4 Exps with id (in 4 Exps) | # Exps with id (in 6 exps) |                    |                        |  |
| GRMZM2G138419      | Osmotin-like protein                            | 2                              | 4                              | 4                              | 5                          | AT2G28790          |                        |  |
| GRMZM2G084767      | Importin subunit beta-1                         | 2                              | 4                              | 3                              | 6                          | AT3G08947          |                        |  |
| GRMZM2G441753      | TRBOA-glucoside O-methyltransferase BX7         | 2                              | 4                              | 4                              | 2                          | AT4G35160          |                        |  |
| GRMZM2G116079      | putative zinc finger protein30                  | 1                              | 4                              | 1                              | 5                          | AT3G15680          |                        |  |
| GRMZM2G030144      | AP-1 complex subunit gamma                      | 1                              | 3                              | 1                              | 5                          | AT1G60070          |                        |  |
| GRMZM2G139643      | ribonucleoprotein A1, A2/B1 homolog             | 0                              | 2                              | 1                              | 6                          | AT3G13224          |                        |  |
| GRMZM2G020940      | hydroxyproline-rich glycoprotein family protein | 1                              | 3                              | 0                              | 3                          | AT2G39050          |                        |  |
| GRMZM2G347105      | 0                                               | 2                              | 1                              | 4                              | 0                          | 0                  |                        |  |
| GRMZM2G325131      | synthase component 2                            | 1                              | 3                              | 2                              | 0                          | AT5G57890          |                        |  |
| GRMZM5G895313      | COLD SHOCK DOMAIN PROTEIN 1                     | 1                              | 4                              | 0                              | 0                          | AT2G21060          |                        |  |
| GRMZM2G031545      | elongation factor 1-delta 1                     | 0                              | 3                              | 2                              | 0                          | AT2G18110          |                        |  |
| GRMZM2G078274      | Auxin response factor                           | 0                              | 3                              | 0                              | 0                          | AT5G37020          |                        |  |
| GRMZM2G023214      | 15-cis-phytoene desaturase                      | 1                              | 1                              | 1                              | 0                          | AT5G14060          |                        |  |
| GRMZM5G881775      | 40S ribosomal protein S19                       | 0                              | 0                              | 0                              | 6                          | 0                  |                        |  |
| GRMZM2G389768      | Cold shock                                      | 0                              | 0                              | 0                              | 6                          | AT4G36020          |                        |  |
| GRMZM5G832672      | FRIGIDA-like protein 4b                         | 0                              | 0                              | 0                              | 6                          | AT3G22440          |                        |  |
| GRMZM2G057448      | histone-arginine methyltransferase CARM1        | 0                              | 0                              | 0                              | 6                          | AT5G49020          |                        |  |
| GRMZM2G067624      | SQUAMOSA PROMOTER BINDING PROTEIN-LIKE 8        | 0                              | 0                              | 0                              | 6                          | AT1G53160          |                        |  |
| GRMZM2G042992      | TOPLESS                                         | 0                              | 0                              | 0                              | 6                          | AT1G15750          |                        |  |
| GRMZM2G334216      | tract-binding protein homolog 3                 | 0                              | 0                              | 0                              | 6                          | AT1G43190          |                        |  |
| GRMZM2G099860      | trehalose-6-phosphate synthase                  | 0                              | 0                              | 0                              | 6                          | AT1G68020          |                        |  |
| GRMZM5G866100      | Uridine kinase-like protein 2, chloroplastic    | 0                              | 0                              | 0                              | 6                          | AT3G27190          |                        |  |
| GRMZM2G549512      | WRKY transcription factor 4                     | 0                              | 0                              | 0                              | 6                          | AT1G13960          |                        |  |
| GRMZM2G064993      | annexin p33                                     | 0                              | 0                              | 0                              | 5                          | AT5G10230          |                        |  |
| GRMZM2G159028      | RNA binding protein                             | 0                              | 0                              | 0                              | 5                          | AT5G66010          |                        |  |
| GRMZM2G136831      | Serine/threonine-protein kinase WNK-related     | 0                              | 0                              | 0                              | 5                          | AT1G60060          |                        |  |
| GRMZM2G073750      | Auxin response factor                           | 0                              | 0                              | 0                              | 4                          | AT1G30330          |                        |  |
| GRMZM2G026556      | Regulatory protein NPR6                         | 0                              | 0                              | 0                              | 4                          | AT2G41370          |                        |  |
| GRMZM2G073792      | transposable element                            | 0                              | 0                              | 0                              | 4                          | 0                  |                        |  |
| GRMZM2G094497      | vacuolar ATP synthase subunit B                 | 0                              | 0                              | 0                              | 4                          | AT4G38510          |                        |  |
| GRMZM2G119499      | glutathione transferase11                       | 0                              | 0                              | 0                              | 3                          | AT3G03190          |                        |  |
| GRMZM2G589579      | Protein argonaute                               | 0                              | 0                              | 0                              | 3                          | AT2G27040          |                        |  |
| GRMZM2G163406      | Salt stress-induced protein                     | 0                              | 0                              | 0                              | 3                          | AT1G19715          |                        |  |
| GRMZM2G154007      | Alcohol dehydrogenase class-3                   | 0                              | 0                              | 0                              | 2                          | AT5G42250          |                        |  |
| GRMZM2G018950      | Carboxypeptidase Y homolog A                    | 0                              | 0                              | 0                              | 2                          | AT3G45010          |                        |  |
| GRMZM2G020146      | Carboxypeptidase Y homolog A                    | 0                              | 0                              | 0                              | 2                          | AT3G45010          |                        |  |
| GRMZM2G430027      | damage-binding protein 1                        | 0                              | 0                              | 0                              | 2                          | AT4G05420          |                        |  |
| GRMZM2G348666      | Isoleucine--tRNA ligase                         | 0                              | 0                              | 0                              | 2                          | AT4G10320          |                        |  |
| GRMZM2G112074      | licensing factor MCM7                           | 0                              | 0                              | 0                              | 2                          | AT4G02060          |                        |  |
| GRMZM2G166355      | mRNA 3-UTR binding protein                      | 0                              | 0                              | 0                              | 2                          | AT1G17370          |                        |  |
| GRMZM2G133764      | Protein piccolo                                 | 0                              | 0                              | 0                              | 2                          | 0                  |                        |  |
| GRMZM2G119219      | stem-specific protein TSJ1                      | 0                              | 0                              | 0                              | 2                          | AT5G19140          |                        |  |

additional proteins

Supplemental Table 2: Co-purified proteins in TAP experiments on *Arabidopsis* cell cultures transformed with 35S::AN3-GS and analyzed with Orbitrap mass spectrometry

| AGI code  | Name                               | Total/4 exps |
|-----------|------------------------------------|--------------|
| AT1G18450 | ARP4                               | 4            |
| AT1G20670 | BRD1                               | 4            |
| AT1G21700 | SWI3C                              | 4            |
| AT1G43850 | SEU                                | 4            |
| AT2G28290 | SYD                                | 4            |
| AT2G32700 | LUH                                | 4            |
| AT2G46020 | BRM                                | 4            |
| AT3G01890 | SWP73A                             | 4            |
| AT3G03460 | unknown protein                    | 4            |
| AT3G60830 | ARP7                               | 4            |
| AT4G17330 | G2484-1                            | 4            |
| AT4G25520 | SLK1                               | 4            |
| AT4G34430 | SWI3D                              | 4            |
| AT4G35550 | HB-4, WOX13                        | 4            |
| AT5G07980 | dentin sialophosphoprotein-related | 4            |
| AT5G14170 | SWP73B                             | 4            |
| AT5G17510 | GLTSCR                             | 4            |
| AT5G28640 | AN3, GIF                           | 4            |
| AT5G55040 | BRD13                              | 4            |
| AT5G55210 | unknown protein                    | 4            |
| AT5G62090 | SLK2                               | 4            |
| AT1G76380 | BRD2                               | 3            |
| AT3G22990 | LFR                                | 3            |
| AT5G07940 | dentin sialophosphoprotein-related | 3            |
| AT5G07970 | dentin sialophosphoprotein-related | 2            |

| Supplemental Table 3: Comparison of the core components between <i>Arabidopsis</i> and maize |             |              |                                                                                                                                                                                                                                                                                                                                                                                                                                                      |
|----------------------------------------------------------------------------------------------|-------------|--------------|------------------------------------------------------------------------------------------------------------------------------------------------------------------------------------------------------------------------------------------------------------------------------------------------------------------------------------------------------------------------------------------------------------------------------------------------------|
| protein                                                                                      | Arabidopsis | maize        | remarks                                                                                                                                                                                                                                                                                                                                                                                                                                              |
| G2484-1                                                                                      | 1           | 2            | both maize proteins were identified in TAP                                                                                                                                                                                                                                                                                                                                                                                                           |
| SWI3D                                                                                        | 1           | 2            | both maize proteins were identified in TAP                                                                                                                                                                                                                                                                                                                                                                                                           |
| SWI3C                                                                                        | 1 out of 3  | 2 out of 5   | AT1G21700 was identified using AN3 as bait and the other two were identified in reverse TAP experiments using SWP73B as bait in <i>Arabidopsis</i> cell culture. In maize, two of the five SWI3C homologous proteins were identified                                                                                                                                                                                                                 |
| BRD                                                                                          | 3           | 2 out of 6   |                                                                                                                                                                                                                                                                                                                                                                                                                                                      |
| SWP73                                                                                        | 2           | 1            |                                                                                                                                                                                                                                                                                                                                                                                                                                                      |
| SYD                                                                                          |             | misannotated | two genes (GRMZM2G387890 and GRMZM2G467799) were initially identified as SYD homologs and peptides matching both were identified in the TAP experiments, both genes are located 30-kb apart on the same chromosome and encode peptides that correspond to distinct parts of the <i>Arabidopsis</i> SYD homolog. Analysis of RNAseq data showed that these gene models were most likely misannotated and should be considered as a single gene with a |

Supplemental Table 4: Significantly changing proteins between the division zone and the expansion zone. t-test analysis results from the Perseus software on a set of four independent TAP experiments on both dividing and expanding leaf tissue, analyzed by Orbitrap Velos and relative label-free quantification (MaxLFQ) with the MaxQuant software, as presented in Supplemental Data Set 1.

| Leading protein ID | Plaza ID   | Description                          | At ortholog (BHIF) | Background | Significant <sup>1</sup> | Test statistic <sup>2</sup><br>(y-axis in<br>Figure 2) | Difference <sup>3</sup><br>(x-axis in<br>Figure 2) |
|--------------------|------------|--------------------------------------|--------------------|------------|--------------------------|--------------------------------------------------------|----------------------------------------------------|
| GRMZM2G066460      | ZM06G01850 | 60S acidic ribosomal protein P0      | AT3G09200          | y          | +                        | 4,28                                                   | 2,80                                               |
| GRMZM2G119499      | ZM01G02590 | glutathione transferase11            | AT3G03190          |            | +                        | 4,08                                                   | 4,00                                               |
| GRMZM2G067303      | ZM09G24710 | S ribosomal protein S20 Fragment (S2 | AT3G47370          | y          | +                        | 4,02                                                   | 3,18                                               |
| GRMZM5G850129      | ZM06G15600 | GRF7                                 | AT3G13960          |            | +                        | 3,98                                                   | 6,57                                               |
| GRMZM2G090422      | ZM01G53160 | 60S ribosomal protein L13a           | AT5G48760          | y          | +                        | 3,78                                                   | 3,33                                               |
| GRMZM2G178261      | ZM01G51610 | GRF15                                | AT2G22840          |            | +                        | 3,18                                                   | 6,00                                               |
| GRMZM2G119359      | ZM09G06280 | GRF12                                |                    |            | +                        | 3,13                                                   | 4,89                                               |
| GRMZM5G895313      | ZM10G24580 | COLD SHOCK DOMAIN PROTEIN 1 (CSDP1   | AT2G21060          |            | +                        | 3,13                                                   | 4,83                                               |
| GRMZM2G112210      | ZM02G19410 | dirigent                             |                    |            | +                        | 2,19                                                   | 5,13                                               |
| GRMZM2G041223      | ZM02G05420 | GRF6                                 | AT3G13960          |            | +                        | 2,07                                                   | 5,11                                               |
| GRMZM2G034876      | ZM05G37690 | GRF1                                 | AT3G13960          |            | +                        | 2,00                                                   | 5,71                                               |
| GRMZM2G124566      | ZM04G21130 | GRF17                                | AT2G36400          |            | +                        | 1,93                                                   | 6,10                                               |

<sup>1</sup>Significant: This column indicates which data points were significant in the two groups test.

<sup>2</sup>Test statistic:  $-\log_{10}$  p-value, taking into account FDR=0.01 and S0=0.9

<sup>3</sup>Difference:  $\log_2(\text{LFQratio}(\text{division}/\text{expansion})) = \log_2$  average LFQ intensity (group1, division) -  $\log_2$  average LFQ intensity (group2, expansion); calculated from the Proteingroups file (Supplemental Data Set 1) with the Perseus software (as described in the methods section, briefly: LFQ intensities were logged; missing values were imputed from a normal distribution around the detection limit of the mass spectrometer; average  $\log_2$  LFQ intensity was calculated for each identification in both groups: division (cm1, green columns) and expansion (cm4, red columns); for each identification, the difference in average  $\log_2$  LFQ intensity between the 2 groups is



Supplemental Table 5. Sequence of the qPCR primers

| <i>gene</i> | <i>accession number</i> | <i>forward primer</i> | <i>reverse primer</i>  |
|-------------|-------------------------|-----------------------|------------------------|
| GRF1        | GRMZM2G034876           | CCACTGATCGGTTGTCTG    | GTTCTGCCTTTCTTCGG      |
| GRF1        | GRMZM2G034876           | CAGCTACTCCTACGCAGCTC  | GCCACTGGCTCTATCGAC     |
| GRF2        | GRMZM2G099862           | AGACATCTTAAGTACCATT   | CTGCTAGACATTTGTAGGA    |
| GRF3        | GRMZM2G105335           | CCGAATGAAACCTCCAGAA   | GCGAAGCAATACAGAGTAATAC |
| GRF4        | GRMZM2G004619           | AAGTACTGCGAACGCCACAT  | GGGAGCAGATTTTGAGCCTGA  |
| GRF5        | GRMZM2G129147           | GCCTTATGTAACGCTATT    | TCACTGAGTACAAAGAAAC    |
| GRF6        | GRMZM2G041223           | CTAGTATCATGCTCCTGGA   | CCACGAGAACATACAAT      |
| GRF7        | GRMZM5G850129           | AGCCAAAGACTCCAATTCA   | AACAATGATGAAGCGGCAG    |
| GRF8        | GRMZM2G033612           | CTTCTGGATACGGCTGTA    | TTCTGTCAATCAAAGTGTT    |
| GRF9        | GRMZM5G893117           | TGTCTATAGCCTTGTAGGT   | CCGCTCATCATCATCATC     |
| GRF10       | GRMZM2G096709           | TCACCTCGTCTTCCCGGTAT  | CGTCCTCAGGAAAACCATCT   |
| GRF11       | GRMZM2G067743           | CAAGCAGCAATAGGACTCTA  | GTCACCCGAACAACAAC      |
| GRF12       | GRMZM2G119359           | AATCGCATTAAAGAACAAG   | CATGGTCGGTACTACAAC     |
| GRF13       | GRMZM2G018414           | TCTGAATCTGGCTGTATCT   | GGACCACTGAAGTTTCTG     |
| GRF14       | GRMZM2G098594           | CAGCTCTCCATCTCCATC    | GCAGCGAACAGAATCAAG     |
| GRF15       | GRMZM2G178261           | ACCTCTCGATGCTGACTTCC  | CATACTCTGTGAGCCGAGCA   |
| GRF16       | GRMZM5G853392           | GCAATATAGCAGGGAAGTGGC | TGGAAGTCAGCATCGAGACAT  |
| GRF17       | GRMZM2G124566           | GGTTATTACTGTGTCGTG    | TAAACAGCAGAATCAACG     |
| GRF18       | GRMZM2G045977           | GCCGTTCAAGAAAGCCTGTG  | CTGTGGGCGAGGAGGAC      |

| Supplemental Table 6. MaxQuant search parameters                      |                                        |
|-----------------------------------------------------------------------|----------------------------------------|
| <b>Group specific parameters</b>                                      |                                        |
| <b>General</b>                                                        |                                        |
| type                                                                  | standard                               |
| multiplicity                                                          | 1                                      |
| variable modifications                                                | Acetyl (Protein N-term), Oxidation (M) |
| digestion mode                                                        | specific                               |
| enzyme                                                                | Trypsin/P                              |
| max missed cleavages                                                  | 2                                      |
| instrument type                                                       | orbitrap                               |
| <b>Label free quantification</b>                                      |                                        |
| label free quantification                                             | LFQ                                    |
| LFQ min ratio count                                                   | 1                                      |
| fast LFQ                                                              | TRUE                                   |
| LFQ min number of neighbors                                           | 3                                      |
| LFQ av number of neighbors                                            | 6                                      |
| <b>First search</b>                                                   |                                        |
| separate var modifications first search                               | FALSE                                  |
| separate enzyme first search                                          | FALSE                                  |
| <b>Advanced</b>                                                       |                                        |
| main search ppm                                                       | 4,5                                    |
| max number of mod per peptide                                         | 5                                      |
| max charge                                                            | 7                                      |
| individual pept mass tolerances                                       | TRUE                                   |
| <b>Global parameters</b>                                              |                                        |
| <b>General</b>                                                        |                                        |
| Fasta files                                                           | ZmB73_5a_WGS_translationsplus.fasta    |
| fixed modifications                                                   | Carbamidomethyl (C)                    |
| re-quantify                                                           | TRUE                                   |
| match between runs                                                    | TRUE                                   |
| matching time window                                                  | 0,5                                    |
| alignment time window                                                 | 20                                     |
| match unidentified features                                           | FALSE                                  |
| <b>Sequences</b>                                                      |                                        |
| decoy mode                                                            | revert                                 |
| special AAs                                                           | KR                                     |
| include contaminants                                                  | TRUE                                   |
| I=L                                                                   | FALSE                                  |
| <b>Identification</b>                                                 |                                        |
| PSM FDR                                                               | 0,01                                   |
| Protein FDR                                                           | 0,01                                   |
| Site Decoy Fraction                                                   | 0,01                                   |
| min Pep Length                                                        | 7                                      |
| min peptides                                                          | 1                                      |
| min Razor+Unique peptides                                             | 1                                      |
| min Unique peptides                                                   | 1                                      |
| min score unmodified peptides                                         | 0                                      |
| min score modified peptides                                           | 40                                     |
| min Delta score unmodified peptides                                   | 0                                      |
| min Delta score modified peptides                                     | 17                                     |
| base FDR calculations on Delta score                                  | FALSE                                  |
| filter labeled AA                                                     | TRUE                                   |
| second peptides                                                       | TRUE                                   |
| dependent peptides                                                    | FALSE                                  |
| <b>Protein Quantification</b>                                         |                                        |
| min ratio count                                                       | 1                                      |
| peptides for quantification                                           | Unique                                 |
| use only unmodified peptides and modifications used in quantification | TRUE                                   |
| card unmodified counterpart peptides                                  | Acetyl (Protein N-term), Oxidation (M) |
| card unmodified counterpart peptides                                  | TRUE                                   |
| <b>Site Quantification</b>                                            |                                        |
| mode                                                                  | Use Least Modified Peptide             |
| use for occupancies                                                   | Normalized Ratios                      |
| <b>Label free quantification</b>                                      |                                        |
| separate LFQ in parameter groups                                      | FALSE                                  |
| LFQ stabilize large ratios                                            | TRUE                                   |
| LFQ require MSMS                                                      | TRUE                                   |
| <b>Advanced</b>                                                       |                                        |
| calc peak properties                                                  | FALSE                                  |
| mass difference search                                                | FALSE                                  |
| top x window                                                          | 100                                    |
| max peptide mass                                                      | 4600                                   |
| min time                                                              | NaN                                    |
| max time                                                              | NaN                                    |
| n peptide length for unspecific search                                | 8                                      |
| x peptide length for unspecific search                                | 25                                     |
| min peak length                                                       | 2                                      |
